# Supplementary material for: The Mechanism of Oxymatrine Targeting miR-27a-3p/PPAR-γ Signaling Pathway through m6A Modification to Regulate the Influence on Hemangioma Stem Cells on Propranolol Resistance
Source: MDPI journal article supplement (doi:10.3390/cancers15215213), 2023-10-30
Supplement: s1 [file s1]

## Supplementary Materials

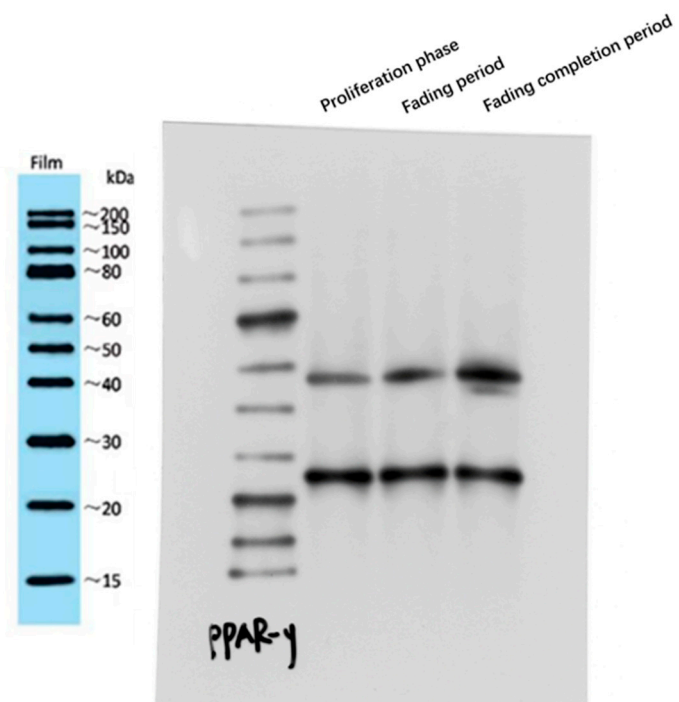

**Supplementary Figure S1:** The original protein blots of Figure 2B. The protein levels of PPAR- $\gamma$  in the proliferation, regression, and completion stages of IH were determined using Western Blot.

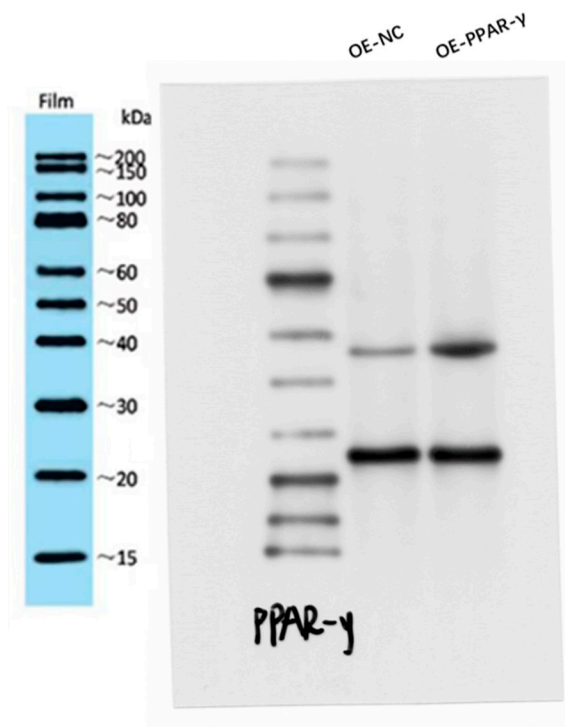

**Supplementary Figure S2:** The original protein blots of Figure 4A. The transfection efficiency of OE-PPAR- $\gamma$  was assessed by Western Blot.

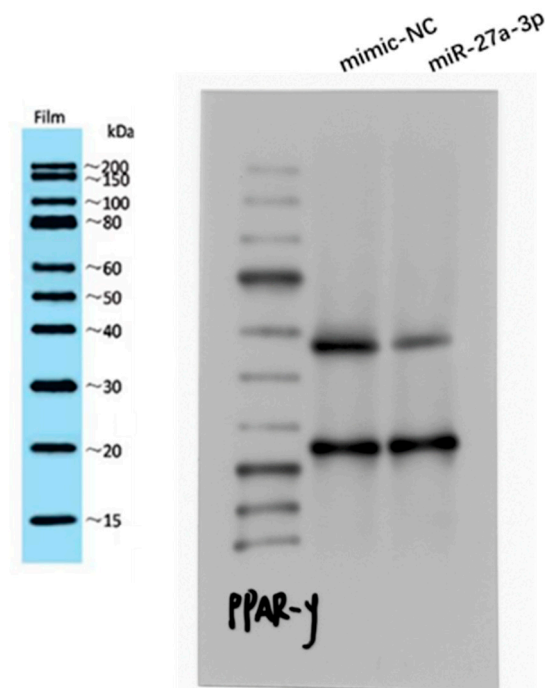

**Supplementary Figure S3:** The original protein blots of Figure 5E. Western Blot analysis were employed to examine the effects of miR-27a-3p on the expression and protein levels of PPAR- $\gamma$ .

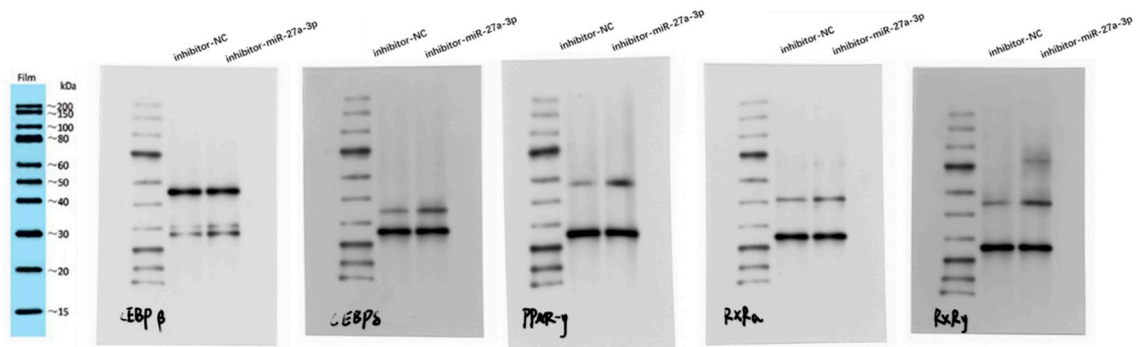

**Supplementary Figure S4:** The original protein blots of Figure 7C. Western Blot was used to detect the effect of miR-27a-3p-inhibitor.

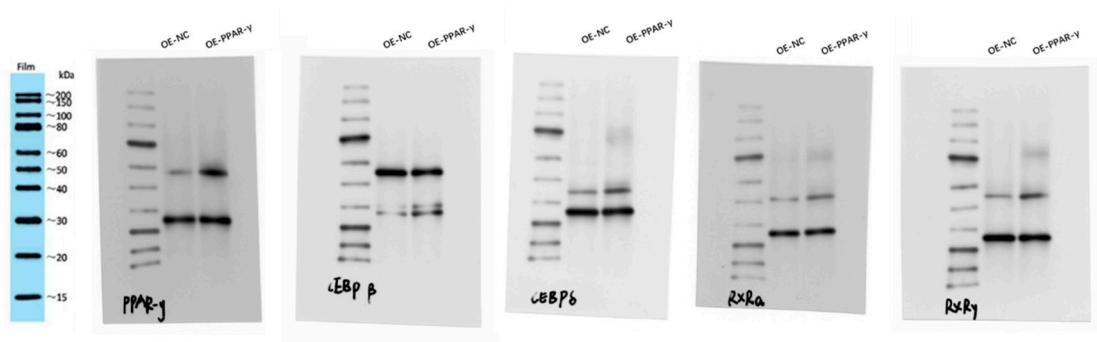

**Supplementary Figure S5:** The original protein blots of Figure 7D. OE-PPAR- $\gamma$  and its effect on the expression of proteins related to adipogenesis in HemSCs, including PPAR- $\gamma$ , C/EBP $\beta$ , C/EBP $\delta$ , RXR $\alpha$ , and RXR $\gamma$ .

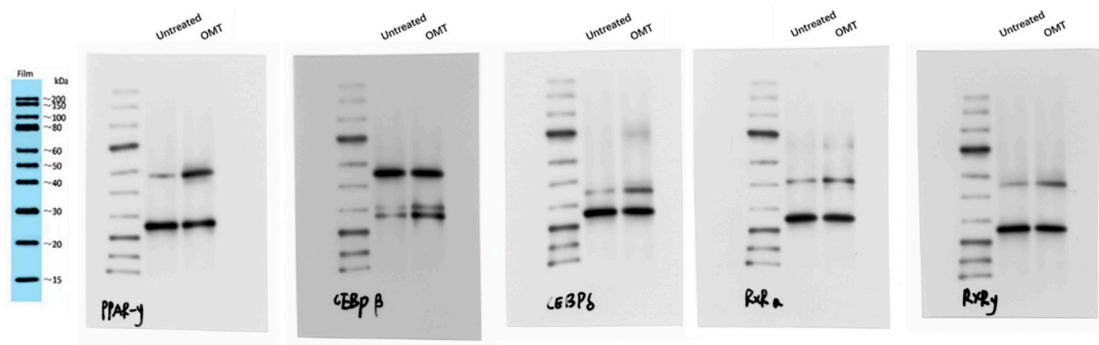

**Supplementary Figure S6:** The original protein blots of Figure 9B. Western Blot detected the effect of OMT on HemSCs cell fat differentiation-related proteins.

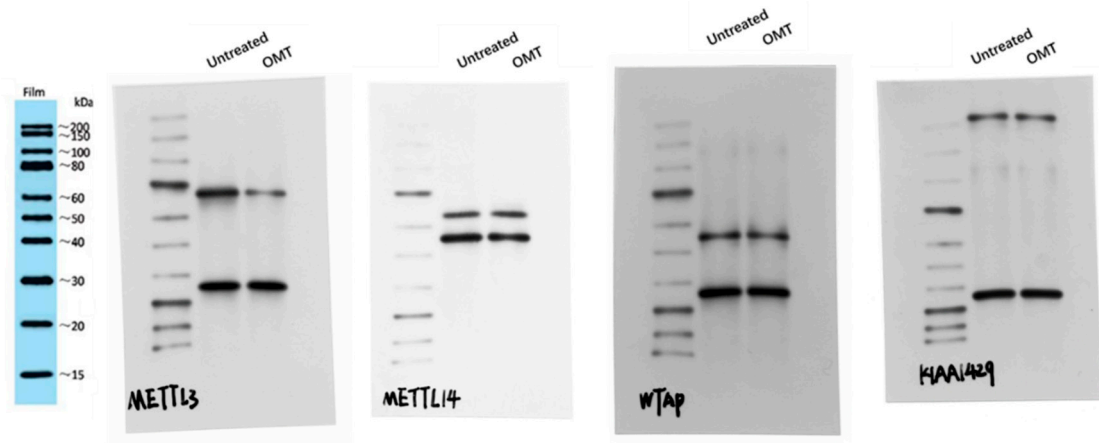

**Supplementary Figure S7:** The original protein blots of Figure 10A. Western Blot detects the effect of OMT treatment on the protein levels of HemSCs/PPNL drug-resistant cells METL3, METL14, WTAP and KIAA1429.

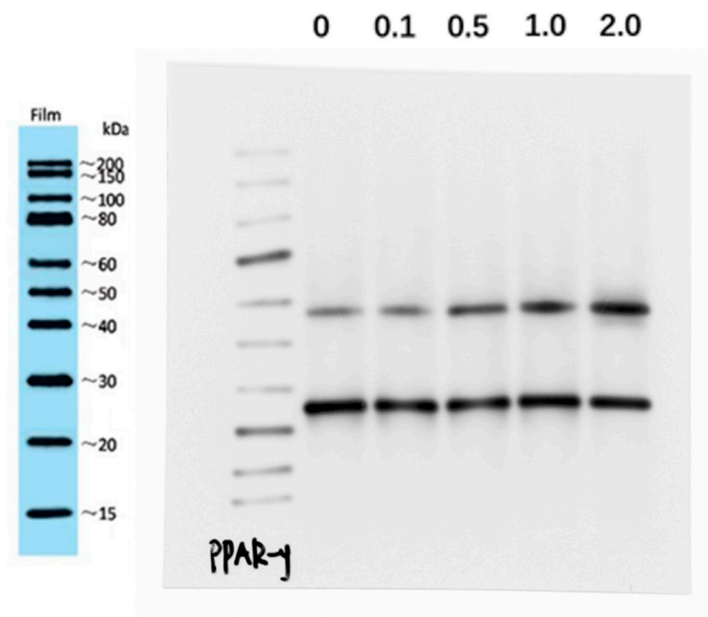

**Supplementary Figure S8:** The original protein blots of Figure 10F. Western Blot detection of the effect of OMT on HemSCs cell PPAR-γ protein level.

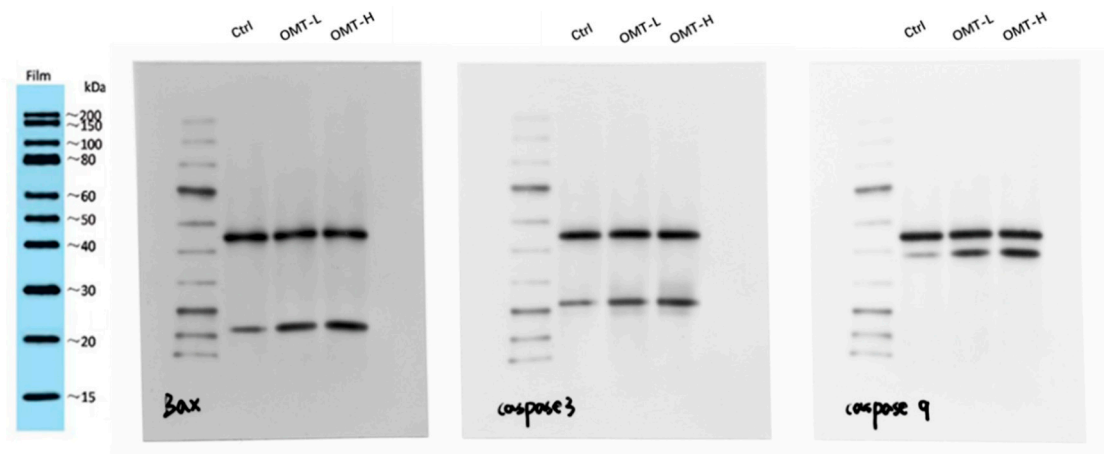

**Supplementary Figure S9:** The original protein blots of Figure 11D. Western Blot detection of apoptosis-related proteins under different treatments the protein expression of Bax, Caspase 3 and Caspase 9.
